# Supplementary material for: Optimisation of an HPLC selected reaction monitoring electrospray tandem mass spectrometry method for the detection of 50 arsenic species
Source: Royal Society of Chemistry journal article supplement (doi:10.1039/b607535e), 2006-01-01

Electronic Supplementary Information  
for the Paper

## Optimisation of an HPLC Selected Reaction Monitoring Electrospray Tandem Mass Spectrometry Method for the Detection of 50 Arsenic Species

Volker Nischwitz\* and Spiros A. Pergantis

University of Crete, Department of Chemistry, Environmental Chemical Processes Laboratory,  
71003 Voutes-Heraklion, Crete, Greece

\* Corresponding author; Tel.: 0030 2810 545098; Fax.: 0030 2810 545001; e-mail:  
vnischwitz@chemistry.uoc.gr

### Contents:

- Structures and names of the investigated arsenic species S2-3

The abbreviations for the arsenosugars are composed of 4 parts

[Nischwitz, V., Pergantis, S.A., *Anal. Chem.*, 2005, **77**, 5551-5563]:

1. The number of methyl-groups bound to the arsenic atom: **DM** for Dimethyl,  
**TM** for Trimethyl
2. Only for the thio-arsenosugars: **Thio**
3. The common core for all  $\beta$ -ribofuranosides: **AsSugar**
4. The characteristic functional group in the aglycone: e.g. **Glycol**

- Collision induced dissociation (CID) breakdown curves for 14 arsenic species S4-8

| R               | DMAsSugar-                                                                           | TMAsSugar-                                                                           | DMThioAsSugar-                                                                      |
|-----------------|--------------------------------------------------------------------------------------|--------------------------------------------------------------------------------------|-------------------------------------------------------------------------------------|
|                 | 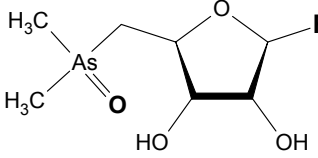    |    |  |
| Adenine         |    |                                                                                      |                                                                                     |
| Amino-Sulfonate |    |                                                                                      |                                                                                     |
| Carbamate       |     |                                                                                      |                                                                                     |
| Carboxyl        |     |                                                                                      |                                                                                     |
| Carboxyl-2      |    |                                                                                      |                                                                                     |
| Glycol          |   |                                                                                      |                                                                                     |
| Hydroxy         | -OH                                                                                  |                                                                                      |                                                                                     |
| Mannitol        |  |                                                                                      |                                                                                     |
| Methoxy         | -O-CH <sub>3</sub>                                                                   |                                                                                      |                                                                                     |
| Phosphate       |  |                                                                                      |                                                                                     |
| Sulfate         |  |                                                                                      |                                                                                     |
| Sulfonate       |   |                                                                                      |                                                                                     |
| Sulfonate-2     | (proposed structure in analogy to Carboxyl-2)                                        |  |                                                                                     |

|                       | DMArsinoyl-                                                                                                                  | TMArsonio-                                                                                                    | DMThioArsinoyl-                                                                                                             |
|-----------------------|------------------------------------------------------------------------------------------------------------------------------|---------------------------------------------------------------------------------------------------------------|-----------------------------------------------------------------------------------------------------------------------------|
| acetic acid (acetate) | 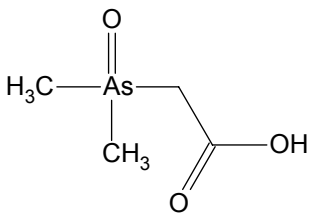 <p>Dimethylarsinoyl-acetic acid (DMAA)</p> |  <p>Arsenobetaine (AsB)</p> |  <p>Dimethylthioarsinoyl-acetic acid</p> |
| ethanol               |  <p>Dimethylarsinoyl-ethanol (DMAE)</p>     |  <p>Arsenocholine (AsC)</p> |  <p>Dimethylthioarsinoyl-ethanol</p>     |

|                                                                                        |                                                                                     |                                                                                      |                                                                                       |
|----------------------------------------------------------------------------------------|-------------------------------------------------------------------------------------|--------------------------------------------------------------------------------------|---------------------------------------------------------------------------------------|
| Tetramethylarsonium ion (TMA)                                                          | 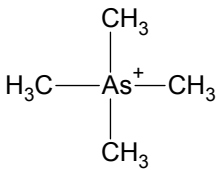 | Trimethylarsine oxide (TMAO)                                                         |  |
| Trimethylarsonio-propionate (AsB-2)                                                    |  | Trimethylarsonio-butyrate (AsB-3)                                                    |  |
| Dimethylarsinic acid (DMA)                                                             |  | Monomethylarsonic acid (MMA)                                                         |  |
| 5-Dimethylarsinoyl-2,3,4-trihydroxypentanoic acid (DMArsinoylTrihydroxypentanoic acid) |                                                                                     |  |                                                                                       |

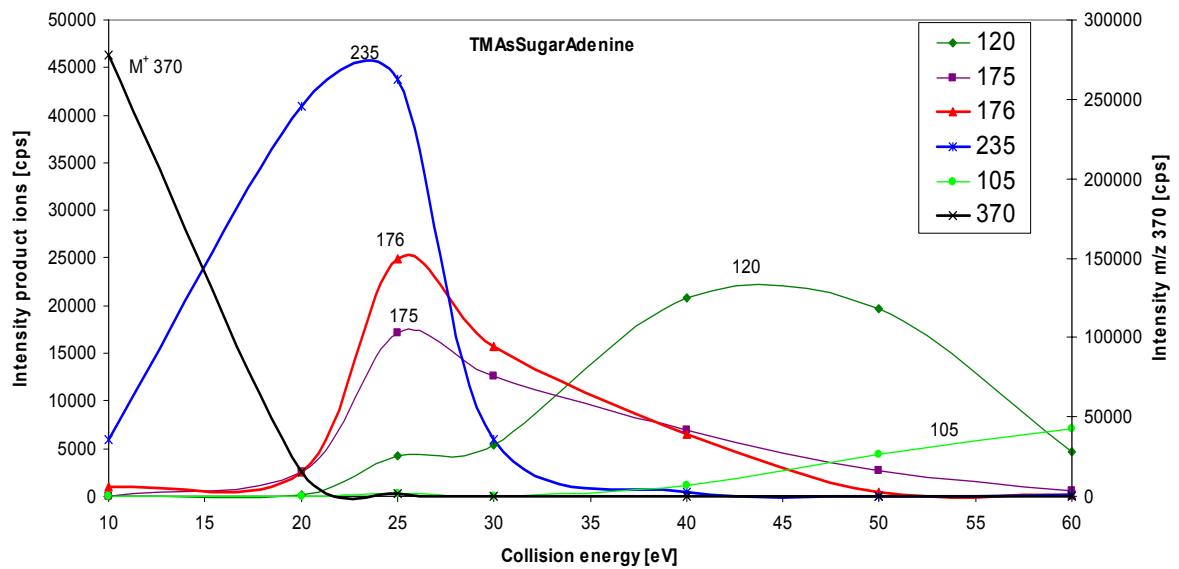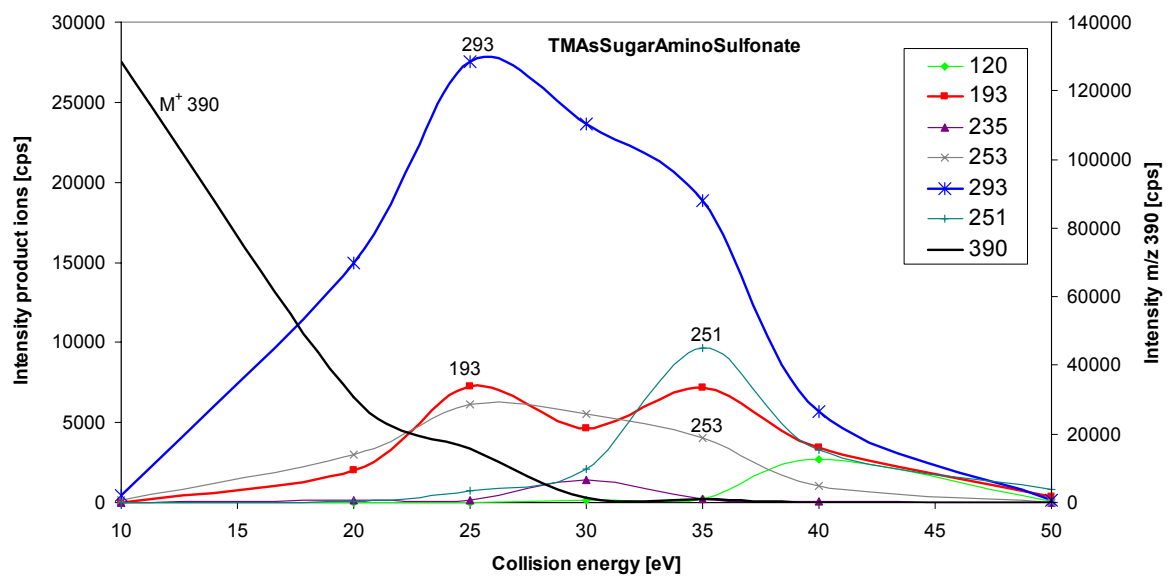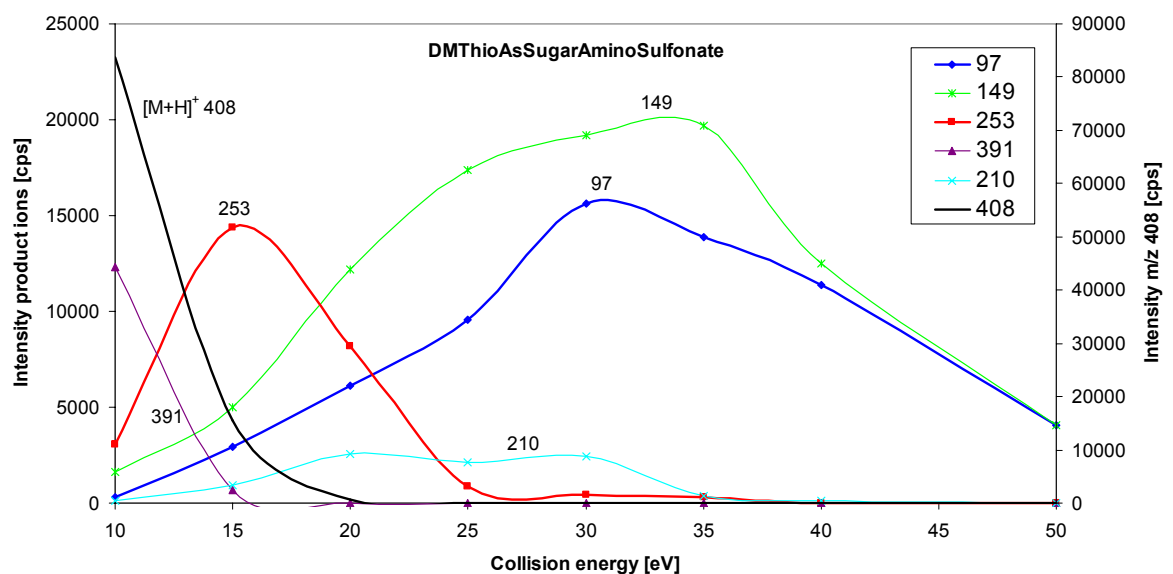

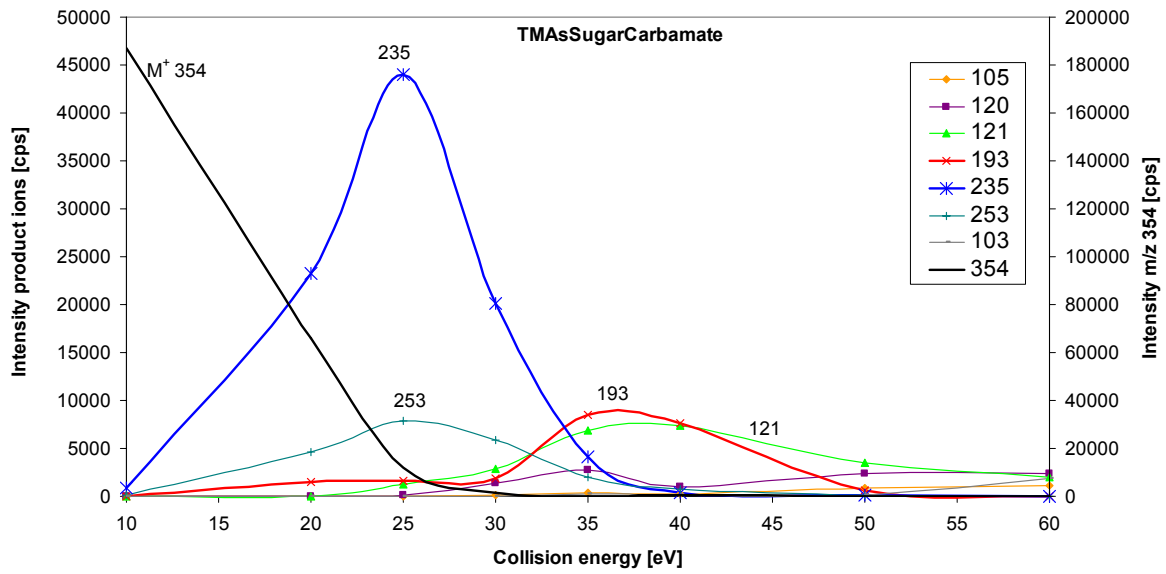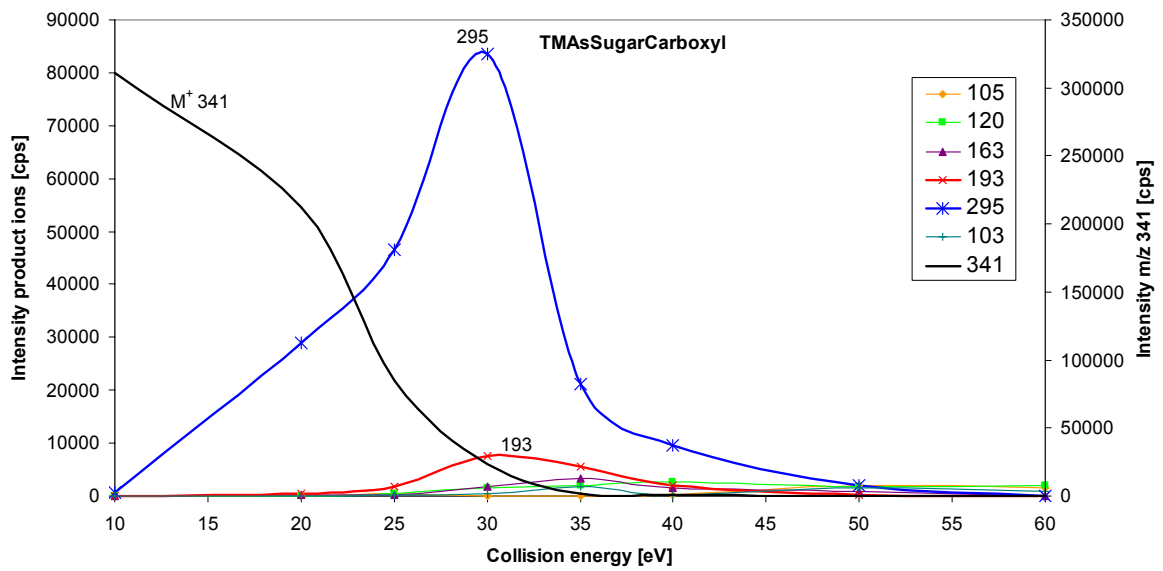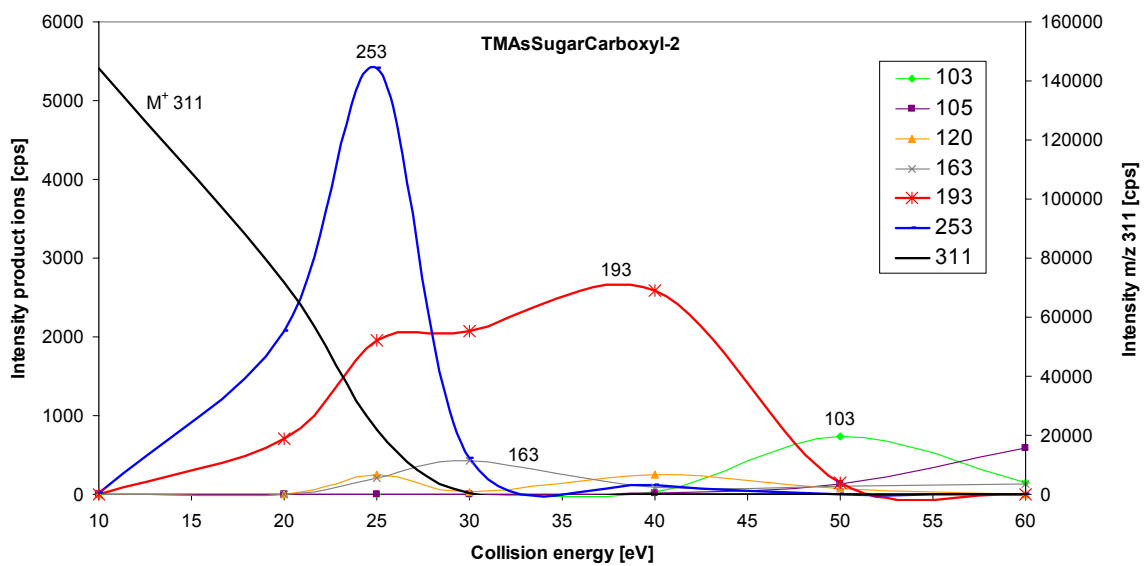

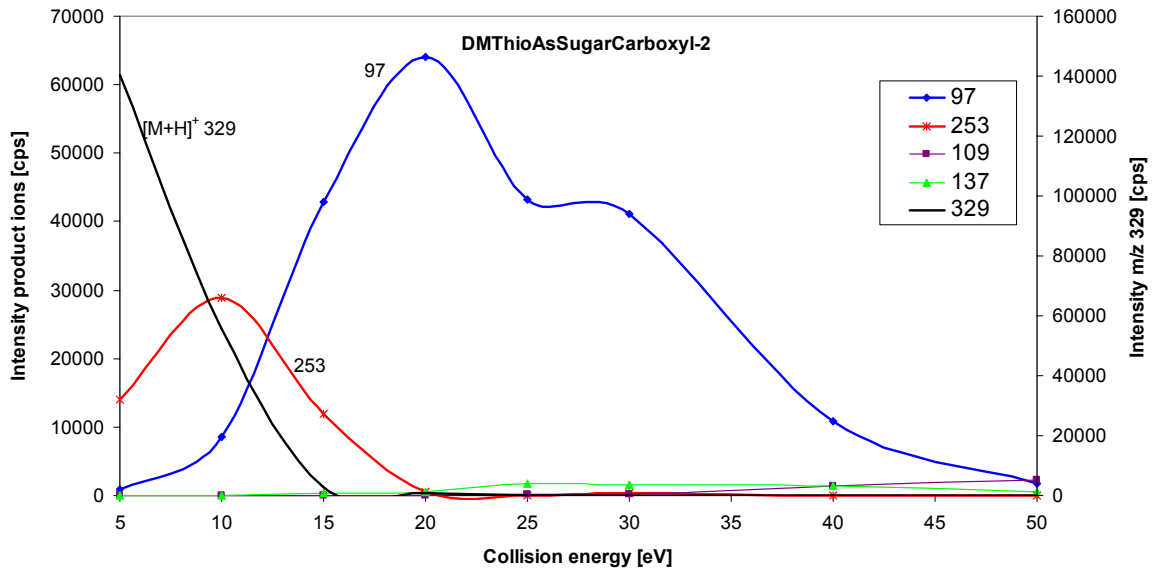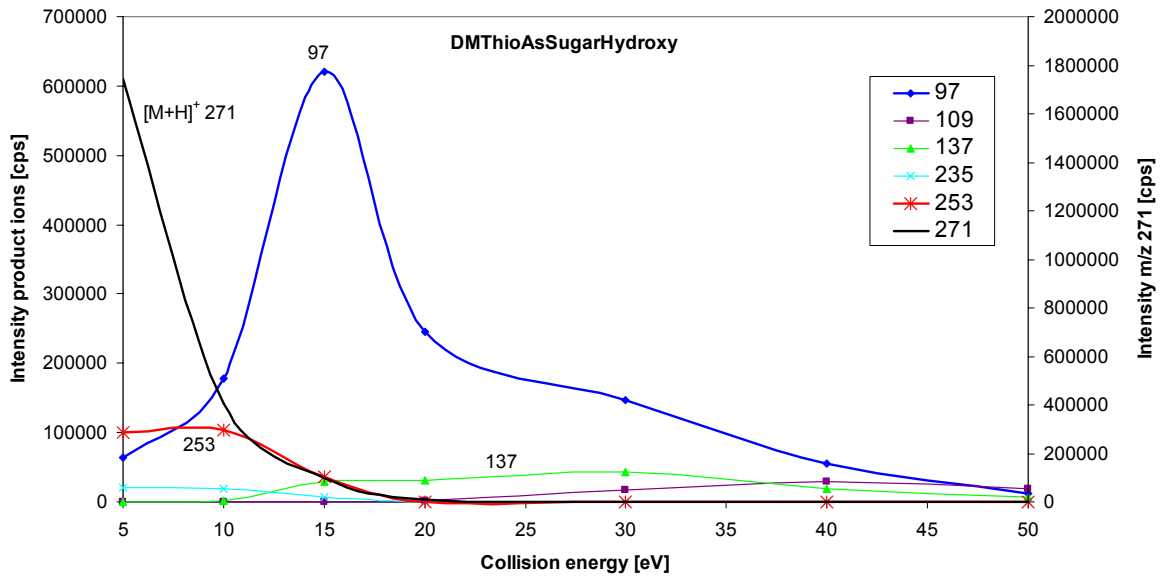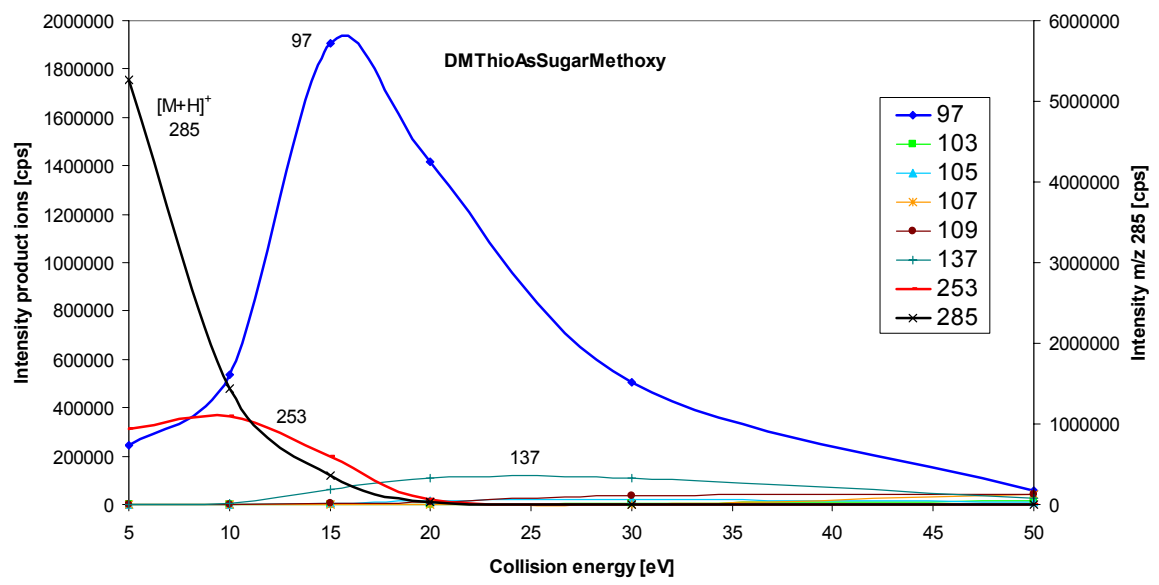

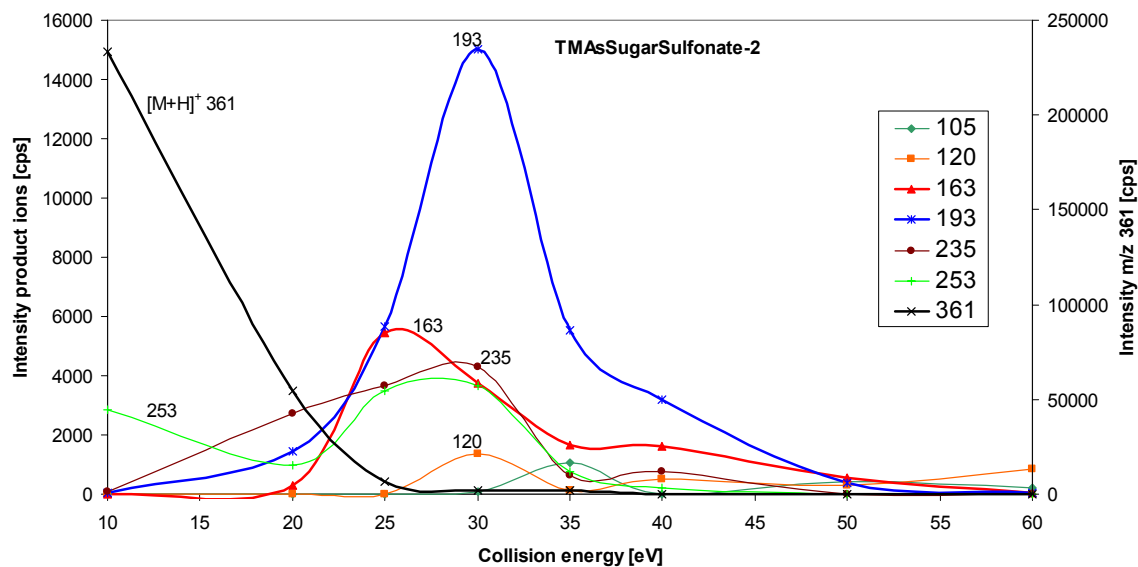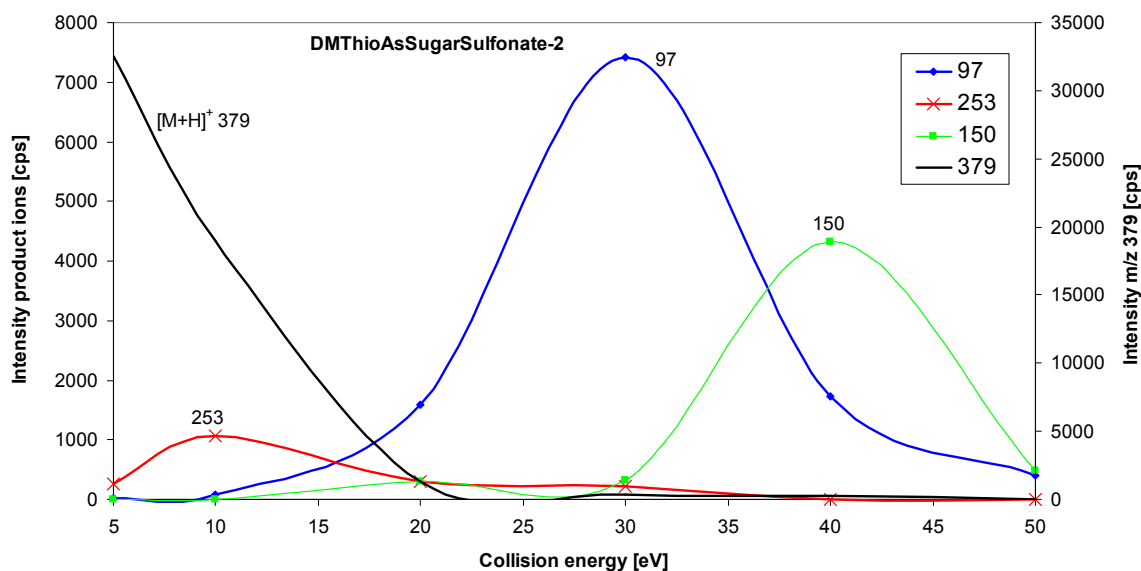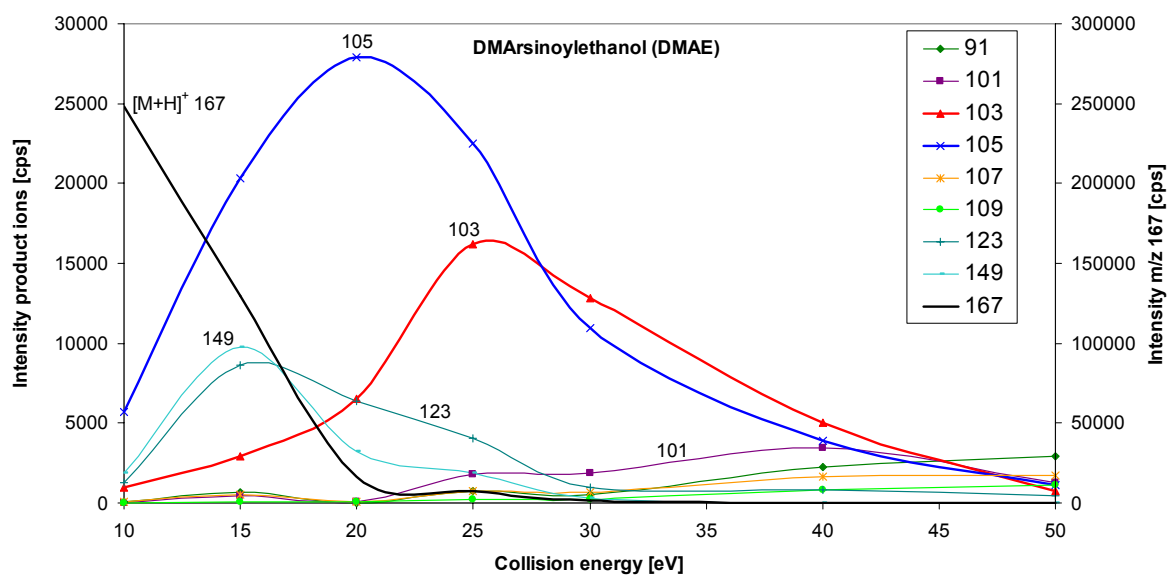

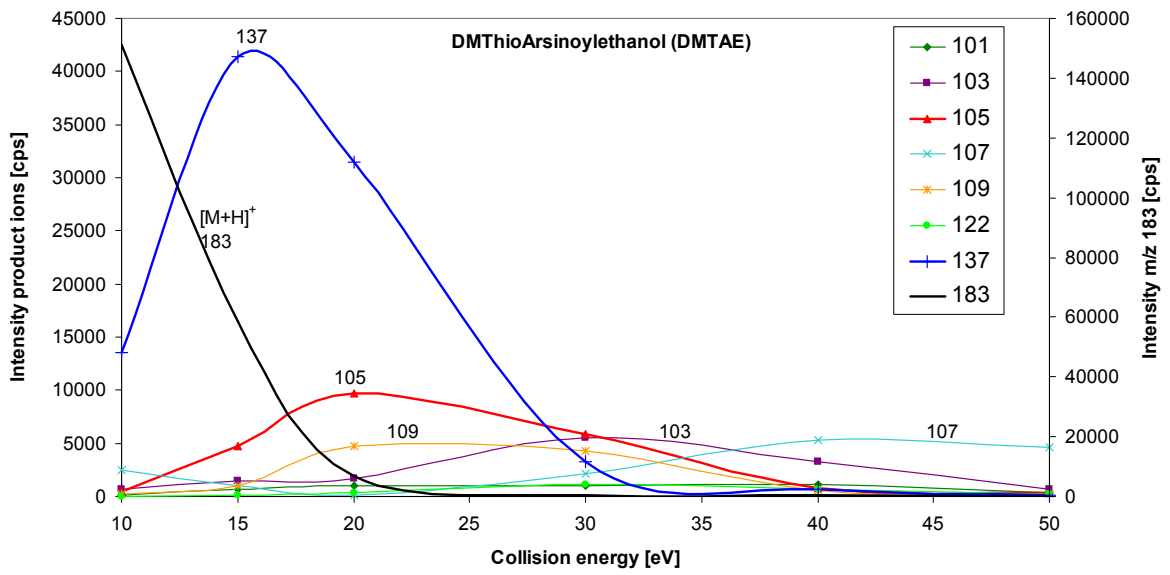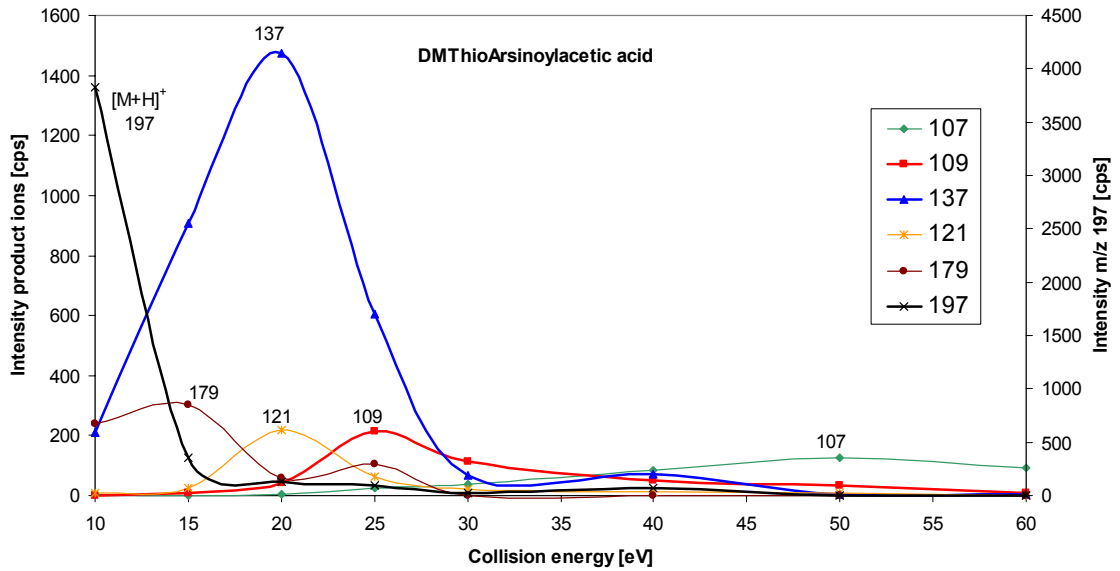

Supplement: b607535e.pdf [file b607535e.pdf]
